# Supplementary material for: Integrating active C3N4 moieties in hydrogen-bonded organic frameworks for efficient photocatalysis
Source: Royal Society of Chemistry journal article supplement (doi:10.1039/d1ta00100k), 2021-01-01
Supplement: d1ta00100k1.pdf [file d1ta00100k1.pdf]

## Supporting Information

### Integrating Active C<sub>3</sub>N<sub>4</sub> Moieties in Hydrogen-bonded Organic Frameworks for Efficient Photocatalysis

Tao Li, Bai-Tong Liu, Zhi-Bin Fang, Qi Yin, Rui Wang and Tian-Fu Liu \*

#### Table of contents

|                                                                                                                                                                                                               |    |
|---------------------------------------------------------------------------------------------------------------------------------------------------------------------------------------------------------------|----|
| <b>1. Materials</b> .....                                                                                                                                                                                     | 2  |
| <b>2. Experimental section</b> .....                                                                                                                                                                          | 3  |
| 2.1. Ligand Synthesis <sup>1</sup> .....                                                                                                                                                                      | 3  |
| 2.2. Preparation of PFC-42 for single crystal x-ray diffraction analysis .....                                                                                                                                | 4  |
| 2.3. Synthesis of powdery PFC-42. ....                                                                                                                                                                        | 4  |
| 2.4. Synthesis of the bulk C <sub>3</sub> N <sub>4</sub> .....                                                                                                                                                | 4  |
| 2.5. Synthesis of the nanosheets C <sub>3</sub> N <sub>4</sub> .....                                                                                                                                          | 4  |
| 2.6. Synthesis of powdery nanosheet C <sub>3</sub> N <sub>4</sub> -Pt .....                                                                                                                                   | 4  |
| 2.7. Synthesis of powdery PFC-42-Pt .....                                                                                                                                                                     | 4  |
| 2.8. Regeneration of PFC-42-Pt .....                                                                                                                                                                          | 5  |
| 2.9 Electrode preparation .....                                                                                                                                                                               | 5  |
| 2.10 Photoelectrochemical Measurements .....                                                                                                                                                                  | 5  |
| 2.11 Photocatalytic Hydrogen Production Reaction .....                                                                                                                                                        | 5  |
| <b>3. Characterizations</b> .....                                                                                                                                                                             | 5  |
| <b>4. Single-Crystal X-ray Crystallography of PFC-42</b> .....                                                                                                                                                | 6  |
| <b>Table S1.</b> Crystal data and structure refinement results for PFC-42 .....                                                                                                                               | 6  |
| <b>5. Supplementary Figures</b> .....                                                                                                                                                                         | 7  |
| <b>Figure S1.</b> The microscope image of PFC-42 .....                                                                                                                                                        | 7  |
| <b>Figure S2.</b> CO <sub>2</sub> adsorption isotherm of PFC-42 at 273 K .....                                                                                                                                | 7  |
| <b>Figure S3.</b> PXRD patterns of the as-synthesized and simulated PFC-42. ....                                                                                                                              | 8  |
| <b>Figure S4.</b> TGA curves of as-synthesized PFC-42. ....                                                                                                                                                   | 8  |
| <b>Figure S5.</b> PFC-42 after being immersed in different solvents .....                                                                                                                                     | 8  |
| <b>Figure S6.</b> UV/vis diffuse reflectance spectra of PFC-42 .....                                                                                                                                          | 9  |
| <b>Figure S7.</b> ATR-IR spectra of PFC-42 before and after loading PtNP .....                                                                                                                                | 9  |
| <b>Figure S8.</b> Comparison of XPS spectra of N 1s orbitals of PFC-42 and PFC-42-Pt .....                                                                                                                    | 10 |
| <b>Figure S9.</b> PXRD patterns of as-synthesized PFC-42, PFC-42-Pt, and PFC-42-Pt after photocatalysis .....                                                                                                 | 10 |
| <b>Figure S10.</b> SEM images of PFC-42 before and after loading Pt .....                                                                                                                                     | 10 |
| <b>Figure S11.</b> Elemental mapping of PFC-42-Pt .....                                                                                                                                                       | 11 |
| <b>Figure S12.</b> Pt 4f XPS spectra of PFC-42 before and after H <sub>2</sub> evolution. ....                                                                                                                | 11 |
| <b>Figure S13.</b> PXRD patterns of as-synthesized bulk C <sub>3</sub> N <sub>4</sub> -Pt, nanosheet C <sub>3</sub> N <sub>4</sub> -Pt, and C <sub>3</sub> N <sub>4</sub> -Pt after photocatalysis .....      | 12 |
| <b>Figure S14.</b> SEM images of nanosheet C <sub>3</sub> N <sub>4</sub> .....                                                                                                                                | 12 |
| <b>Table S2.</b> The apparent quantum efficiency results for PFC-42 .....                                                                                                                                     | 13 |
| <b>Figure S15.</b> PXRD patterns of as-synthesized PFC-42-Pt, PFC-42-Pt-decomposed (destroyed with 12M HCl) and recovered PFC-42-Pt .....                                                                     | 13 |
| <b>Figure S16.</b> Photocatalytic H <sub>2</sub> evolution performance of as-synthesized PFC-42-Pt, Destroyed PFC-42-Pt (destroyed with 12M HCl) and-Recovered PFC-42-Pt (immersed in Methanol for 24h) ..... | 14 |
| <b>Figure S17.</b> N <sub>2</sub> adsorption isotherm of bulk C <sub>3</sub> N <sub>4</sub> at 77 K. ....                                                                                                     | 14 |

|                                                                                                                         |    |
|-------------------------------------------------------------------------------------------------------------------------|----|
| <b>Figure S18.</b> N <sub>2</sub> adsorption isotherm of nanosheet C <sub>3</sub> N <sub>4</sub> at 77 K.....           | 15 |
| <b>Figure S19.</b> Photocatalytic activity lasting 16 hours.....                                                        | 15 |
| <b>Figure S20.</b> Fluorescence quantum efficiency of Ligand. ....                                                      | 16 |
| <b>Figure S21.</b> Fluorescence quantum efficiency of PFC-42.....                                                       | 16 |
| <b>Figure S22.</b> Fluorescence quantum efficiency of PFC-42-Pt.....                                                    | 17 |
| <b>Table S3.</b> Fluorescence quantum efficiency results.....                                                           | 17 |
| <b>6. Summary of the performance of similar catalytic systems</b> .....                                                 | 17 |
| <b>Table S4.</b> Summary of the activities of similar MOF or COF-based photocatalysts for H <sub>2</sub> evolution..... | 17 |
| <b>7. References:</b> .....                                                                                             | 18 |

## 1. Materials

Unless otherwise mentioned, all reagents and solvents were purchased from commercial sources and used as received without further purification.

## 2. Experimental section

### 2.1. Ligand Synthesis<sup>1</sup>

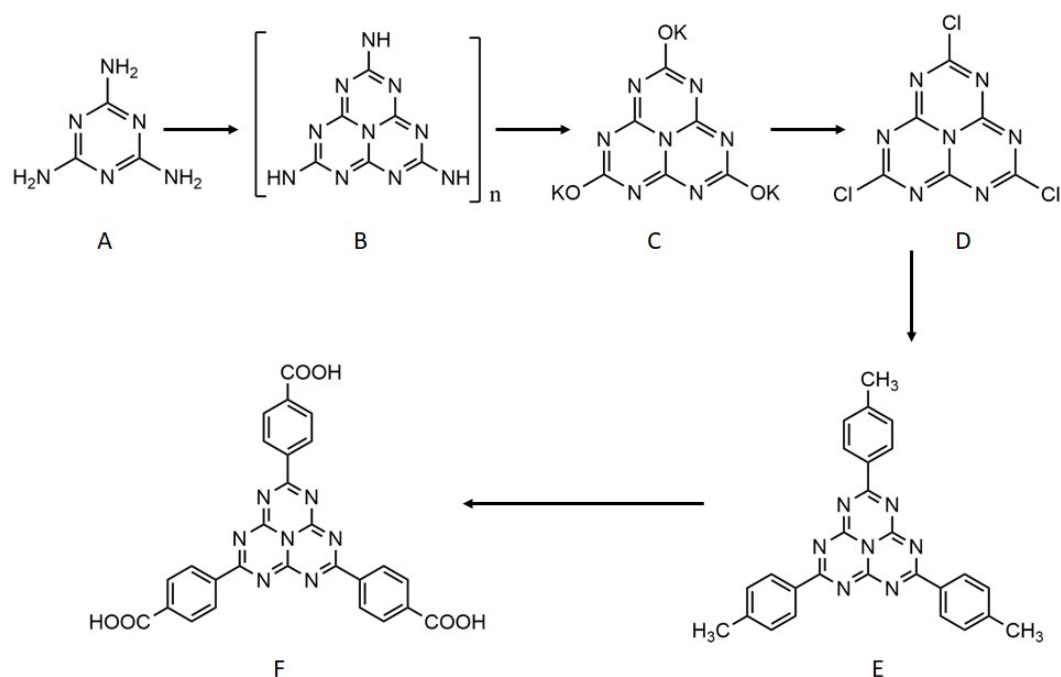

#### (1) Synthesis of B

50 g of melamine (2,4,6-triamino-*s*-triazine) was put into an evaporating dish and heated at about 300 °C for several hours until almost no gas came out. The white solid was then heated at 450 °C for 2 hours. The light yellow solid was washed with 100 mL 10% KOH aqueous solution and then boiled with 36% of HCl aqueous solution for 10 minutes to yield 25 g of melon. (25 g, yield: 50 %).

#### (2) Synthesis of C

25 g of melon (B) was refluxed with 500 mL of 2.5 M KOH aqueous solution until all the solids were dissolved. The solution was then concentrated to about 200 mL. A large number of white needle crystals appeared. The solution was cooled to 0 °C in the bath

of ice/water. The product was separated by the Buchner funnel. The filtration was concentrated again. potassium cyamelurate  $C_6N_7(OK)_3$  of the crystal was collected. (21 g, yield: 84 %).

### (3) Synthesis of D

3.87 g C and 8.64 g  $PCl_5$  was charged in a Schlenk bottle. The mixture was heated at 130 °C under vacuum for about two hours. 70 mL  $POCl_3$  was added to the solid mixture and refluxed for 6 hours. The color of the reaction slurry turned from white to yellow. The solvent was removed and the residue solid was washed with cold water. (3.2 g, Yield:82%).

### (4) Synthesis of E

3.6 g of 2,5,8-trichloro-*s*-heptazine (D) was dispersed in 40 mL of toluene. Anhydrate  $AlCl_3$  was suspended in 40 mL of toluene and heated at 60 °C. To which solution of D was slowly added in batches. The color of the reactant changed to dark red once the 2,5,8-trichloro-*s*-heptazine was added. After reacted for 30 minutes, yellow compound can be observed. 300 mL of ice water was added. A large amount of yellow product appeared. The glassware was rinsed with THF. The product is filtered, and the solids were washed three times with acetone. (Yield of 2,5,8-*p*-methylbenzene-*s*-heptazine: 83 %).  $^1H$  NMR, 2.017 (s, 9H), 7.024 (d, 6H), 8.854 (d, 6H).

### (5) Synthesis of F

1 g of 2,5,8-*p*-methylbenzene-*s*-heptazine (E), 20.5 g HAc, 1.23 mL concentrated  $H_2SO_4$  were added into a 100 mL flask in a 0 °C water bath. 2.03 g fine  $CrO_3$  powder and 1.35 g  $Ac_2O$  was added slowly into the system. The flask was kept in the cool bath for 10 minutes. After that, the mixture was allowed to be stirred overnight. The color of solution was finally changed to green. The product was poured into 300 mL distilled water. The yellow solid was obtained by centrifugation and dissolved in 50 mL 6 M NaOH aqueous solution. Green solution and some white insoluble precipitate were obtained. After removing the precipitation by centrifugation, the solution was adjusted to pH 2, which gave rise to yellow precipitation. The solid was separated (by centrifugation) and washed successively by ethanol and ether (three times, 10 mL for each time), and then dried under vacuum (0.6 g, yield: 60 %).  $^1H$  NMR, 8.17 (d 6H), 8.52 (d 6H), 13.40 (s 3H).

## 2.2. Preparation of PFC-42 for single crystal x-ray diffraction analysis

$H_3HTB$  (3 mg, 5.624  $\mu$ mol) was dissolved in 5 mL methanol by sonication. The mixture stands at room temperature for 36 hours to afford yellow block crystals of PFC-42.

## 2.3. Synthesis of powdery PFC-42.

A mixture of  $H_3HTB$  (10mg, 0.01875mmol) and methanol (10.0 mL) were sealed in a 20 mL vial with silicone lined caps and heated at 90 °C for 24 h. After cooling to room temperature, the yellow powder was harvested and washed with methanol three times. (6.1 mg, yield: 61 %).

## 2.4. Synthesis of the bulk $C_3N_4$

The bulk  $C_3N_4$  was prepared by thermal polymerization of melamine as previously reported.<sup>2</sup> Briefly, 5 g of melamine was placed into a corundum crucible and heated at 550 °C (ramp rate: 5 °C/min) under  $N_2$  flow for 4 h (0.97g, yield: 19 %).

## 2.5. Synthesis of the nanosheets $C_3N_4$

$C_3N_4$  nanosheets were synthesized through thermal exfoliation of the protonated bulk  $C_3N_4$ .<sup>2</sup> In detail, bulk  $C_3N_4$  powder was dispersed in a 0.7 M  $HNO_3$  solution (1.0 g bulk  $C_3N_4$  in 21.5 mL  $HNO_3$ ) under stirring for 1 h to obtain protonated bulk  $C_3N_4$ . Then, the protonated bulk  $C_3N_4$  was purified (by ultrasonic for 1 h), centrifuged, and rinsed with  $H_2O$  and EtOH. Finally, 1 g protonated bulk  $C_3N_4$  was heated at 520 °C in air for 4 h (0.18 g, yield: 18 %).

## 2.6. Synthesis of powdery nanosheet $C_3N_4$ -Pt

14 mg nanosheet  $C_3N_4$  was dispersed in 10 mL of methanol by sonication. After that, 0.7 mL  $H_2PtCl_6$  (1 mg/mL in methanol) was added into system, respectively. The solution was sealed in a 20 mL vials and put into a preheated oven at 90 °C for 24 h.

## 2.7. Synthesis of powdery PFC-42-Pt

PFC-42 (14 mg, 0.0073 mmol) was dispersed in 10 mL of methanol by sonication. After that, 0.4 mL, 0.7 mL and 1.2 mL  $H_2PtCl_6$  (1 mg/mL in methanol) was added into system, respectively. The solution was sealed in a 20 mL vials and put into a preheated oven at 90 °C for 24 h.

## 2.8. Regeneration of PFC-42-Pt

The decomposed PFC-42-Pt (destroyed with 12M HCl) was dispersed in 10 mL MeOH. The mixture stands at 90 °C oven for 24 hours to afford regenerated yellow powder PFC-42-Pt.

## 2.9 Electrode preparation.

5 mg of PFC-42 was dispersed in 1 mL  $CH_3OH$ , with 50  $\mu$ L 5% Nafion by ultrasonication for 0.5 h. The as-prepared solution was dropped on the surface of the fluorine-tin oxide (FTO) substrate covering an area about  $1.0 \times 1.0$  cm<sup>2</sup> and then dried in air. This step was repeated three times to achieve uniform coverage. Other electrodes in this study were prepared following the same procedure.

## 2.10 Photoelectrochemical Measurements

Photoelectrochemical characterization was carried out in a standard three-electrode setup, with the Ag/AgCl (1 M KCl) as the reference electrode and a platinum plate as the counter electrode and fluorine-tin oxide (FTO) glass with the samples as the working electrode. 0.2 M  $Na_2SO_4$  was used as the electrolyte. An electrochemical workstation (CHI660D) was used to measure the photocurrent under visible-light illumination ( $\lambda > 400$  nm, 350-W Xe lamp).

## 2.11 Photocatalytic Hydrogen Production Reaction

Photocatalytic hydrogen evolution was performed in a glass reaction cell with quartz cover connected with a closed gas circulation, and the entire system was purged with high purity Ar (99.999%) before illumination. 5 mg powdery samples were spread on the weighing bottle (50×30 mm) and then placed the bottle in the center of the reaction vessel. 13 mL deionized water and 2 mL TEOA were added below the sample holder avoiding direct contact with samples. After the entire system and water were completely degassed, 20 mL Ar was introduced into the system. This evacuation-refill operation was repeated 3 times prior to light irradiation. The visible-light irradiation was provided by a light-intensity-controlled xenon lamp (PerfectLight, Beijing) equipped with a UV-cut filter ( $\lambda \geq 400$  nm). A cooling water-circulation system was used to keep the reaction system at room temperature. The gaseous products were analyzed online hourly using

an Agilent GC7820 gas chromatograph.

### 3. Characterizations

<sup>1</sup>H-NMR spectra were recorded on Bruker AVANCE III 400MHz spectrometers. Single-crystal X-ray diffraction data were collected at 100 K on an Oxford Diffraction SuperNova diffractometer equipped with Cu-K $\alpha$  radiation ( $\lambda=1.5418$  Å). PXRD was performed on Rigaku Miniflex 600 Benchtop X-ray diffraction instrument. TGA was performed on a Seiko S-II instrument, and the dried crystalline samples were heated at a rate of 5 °C/min up to 800 °C and then cooled to room temperature under N<sub>2</sub> atmosphere. CO<sub>2</sub> adsorption-desorption isotherms were performed on Micromatic ASAP 2020 at 273 K. Inductively coupled plasma mass spectrometry (ICP-MS) was conducted on Ultima 2 Inductively Coupled Plasma OES spectrometers from Elementary. The morphology observations were carried on (a HITACHI SU8000 field-emission scanning electron microscope) JSM6700 scanning electron microscopy (SEM), JEM2010 transmission electron microscopy (TEM). UV-vis diffuse reflectance spectra (DRS) were recorded using a UV-vis spectrophotometer (Shimadzu UV-2550) equipped with an integrating sphere, and BaSO<sub>4</sub> powder was used as the reference for the baseline correction. Fourier transform infrared spectroscopy (FTIR) spectra were obtained on a Bruker Spectrum in the range of 4000–250 cm<sup>-1</sup>. X-ray photoelectron spectroscopy (XPS) measurements were performed with the use of an ESCALAB 250Xi spectrometer equipped with an Al-K $\alpha$  X-ray source (1486.6 eV). The solid-state fluorescent spectra were measured at room temperature on an Edinburgh-instruments FS5 fluorescence spectrophotometer. fluorescence quantum efficiency were measured at room temperature on an Edinburgh-instruments FS5 fluorescence spectrophotometer with integrating sphere accessory. The electrochemical impedance spectra (EIS), photocurrent response, and Mott-Schottky plots were carried out on IM6ex (Zahner, Germany).

### 4. Single-Crystal X-ray Crystallography of PFC-42

Single-crystal X-ray diffraction data were collected at 100 K on an Oxford Diffraction SuperNova diffractometer equipped with Cu-K $\alpha$  radiation ( $\lambda = 1.54184$ ). The cell refinement and data collection and reduction are solved by CrysAlisPro software package. The structure was solved by direct method and refined using Olex 2 and SHELXL-2016 software package.

**Table.S1** Crystal data and structure refinement results for PFC-42.

|                   |                                                               |
|-------------------|---------------------------------------------------------------|
| Empirical formula | C <sub>27</sub> H <sub>15</sub> N <sub>7</sub> O <sub>6</sub> |
| Formula weight    | 533.46                                                        |
| Temperature/K     | 100                                                           |
| Crystal system    | monoclinic                                                    |
| Space group       | P2 <sub>1</sub> /n                                            |
| a/Å               | 7.5193(4)                                                     |
| b/Å               | 19.0692(9)                                                    |
| c/Å               | 20.4491(8)                                                    |
| $\alpha$ /°       | 90                                                            |
| $\beta$ /°        | 99.627(4)                                                     |

---

|                                                |                                                               |
|------------------------------------------------|---------------------------------------------------------------|
| $\gamma/^\circ$                                | 90                                                            |
| Volume/ $\text{\AA}^3$                         | 2890.8(2)                                                     |
| Z                                              | 4                                                             |
| $\rho_{\text{calc}}/\text{cm}^3$               | 1.219                                                         |
| $\mu/\text{mm}^{-1}$                           | 0.757                                                         |
| F(000)                                         | 1084.0                                                        |
| Radiation                                      | Cu K $\alpha$ ( $\lambda = 1.54184$ )                         |
| 2 $\theta$ range for data collection/ $^\circ$ | 4.386 to 74.040                                               |
| Index ranges                                   | $-9 \leq h \leq 7, -21 \leq k \leq 23, -25 \leq l \leq 23$    |
| Reflections collected                          | 11613                                                         |
| Independent reflections                        | 5643 [ $R_{\text{int}} = 0.0318, R_{\text{sigma}} = 0.0381$ ] |
| Data/restraints/parameters                     | 5643/0/328                                                    |
| Goodness-of-fit on $F^2$                       | 1.137                                                         |
| Final R indexes [ $I \geq 2\sigma(I)$ ]        | $R_1 = 0.1032, wR_2 = 0.3024$                                 |
| Final R indexes [all data]                     | $R_1 = 0.1442, wR_2 = 0.3267$                                 |
| Largest diff. peak/hole / $e \text{\AA}^{-3}$  | 1.344/-0.756                                                  |

---

## 5. Supplementary Figures

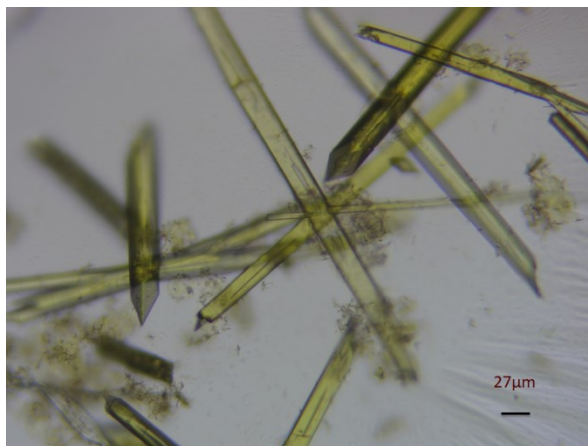

**Figure S1.** The microscope image of PFC-42.

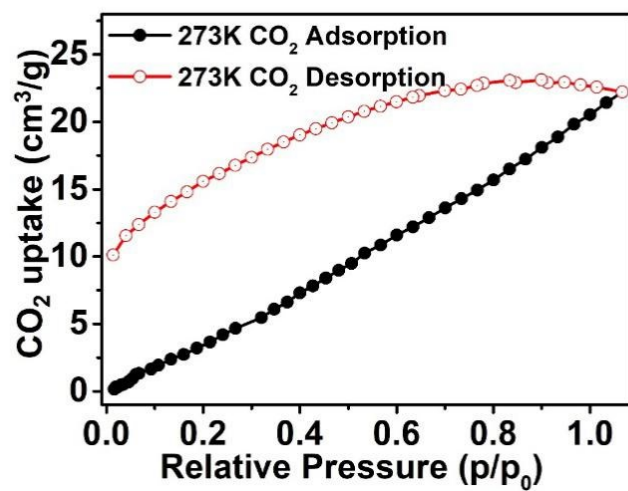

**Figure S2.** CO<sub>2</sub> adsorption isotherm of PFC-42 at 273 K.

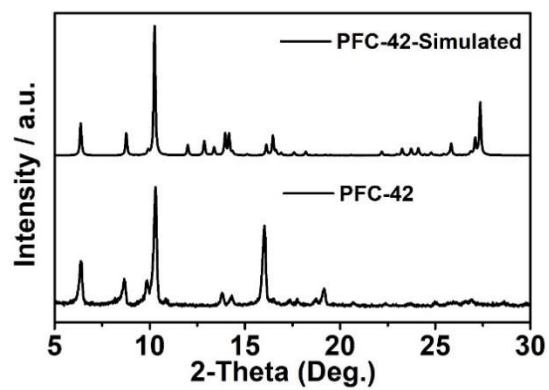

**Figure S3.** PXR D patterns of the as-synthesized and simulated PFC-42.

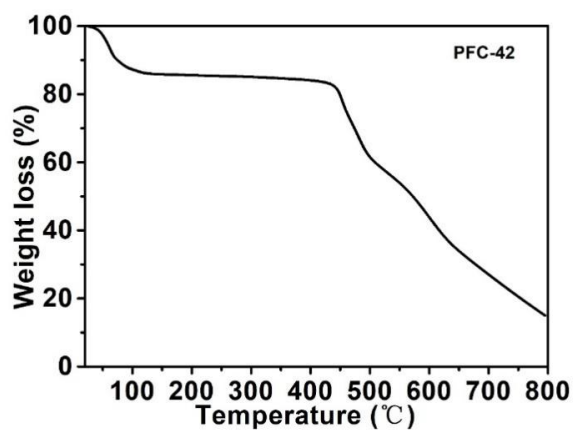

**Figure S4.** TGA curves of as-synthesized PFC-42.

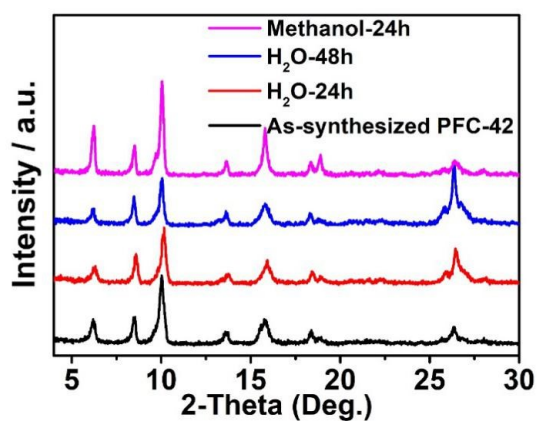

**Figure S5.** PFC-42 after being immersed in different solvents.



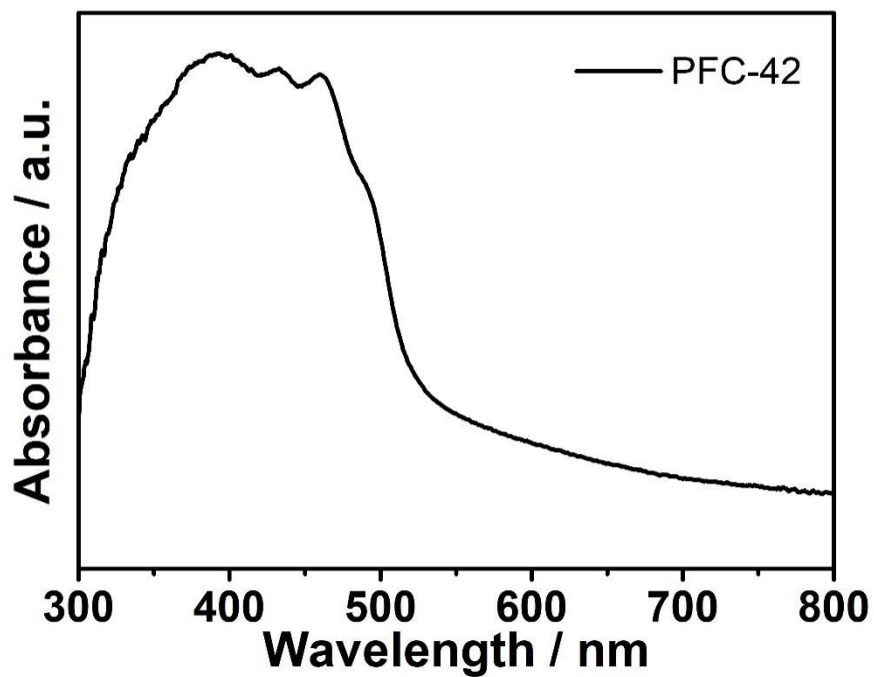

**Figure S6.** UV/vis diffuse reflectance spectra of PFC-42.

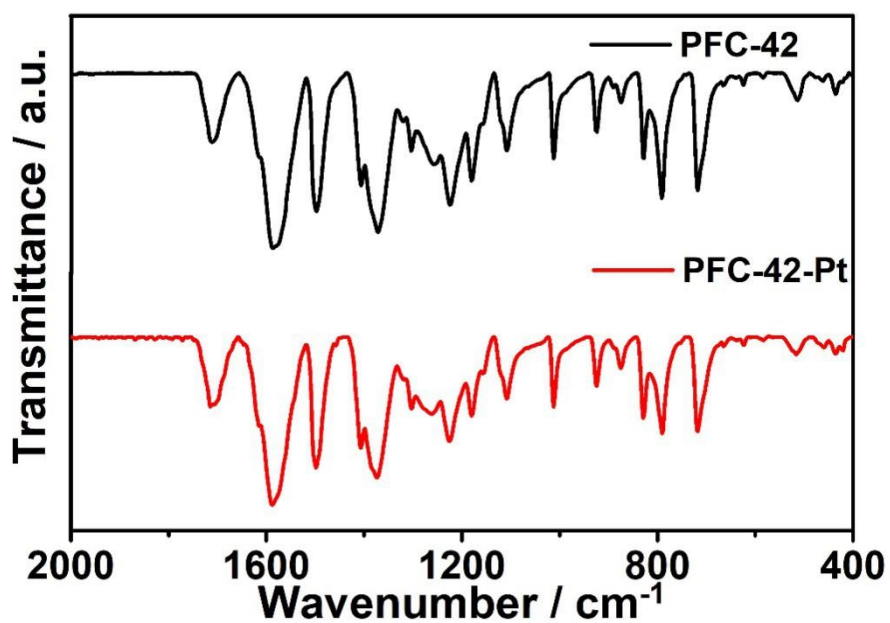

**Figure S7.** ATR-IR spectra of PFC-42 before and after loading PtNP.

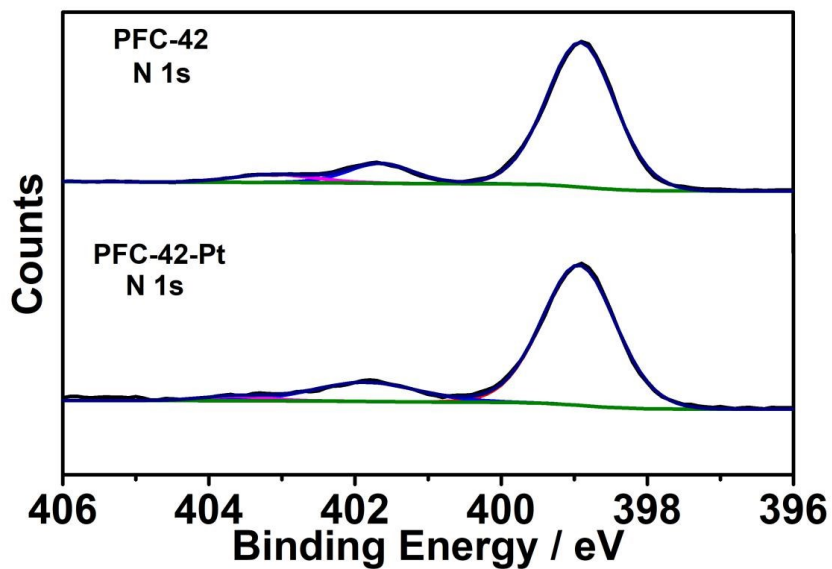

**Figure S8.** Comparison of XPS spectra of N 1s orbitals of PFC-42 and PFC-42-Pt.

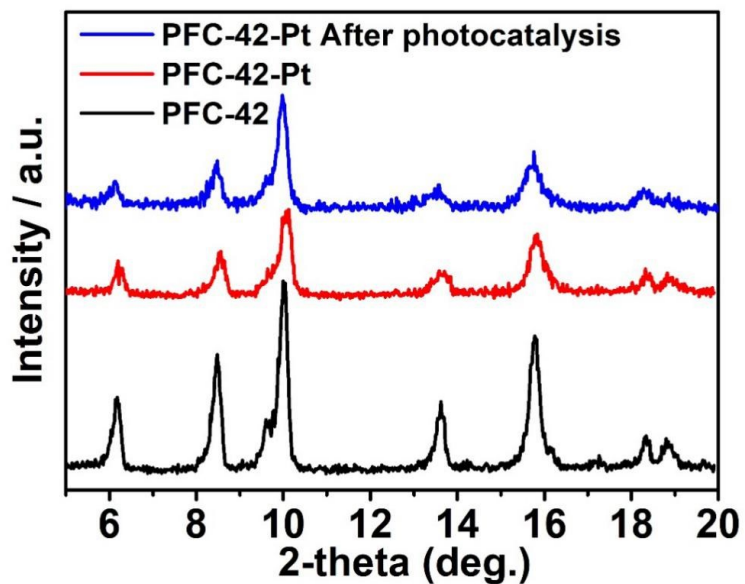

**Figure S9.** PXRD patterns of as-synthesized PFC-42, PFC-42-Pt, and PFC-42-Pt after photocatalysis.

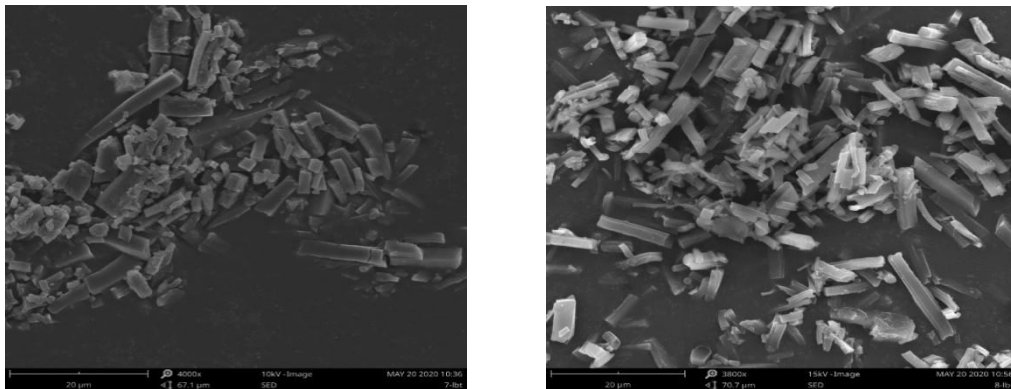

**Figure S10.** SEM images of PFC-42 before and after loading Pt.

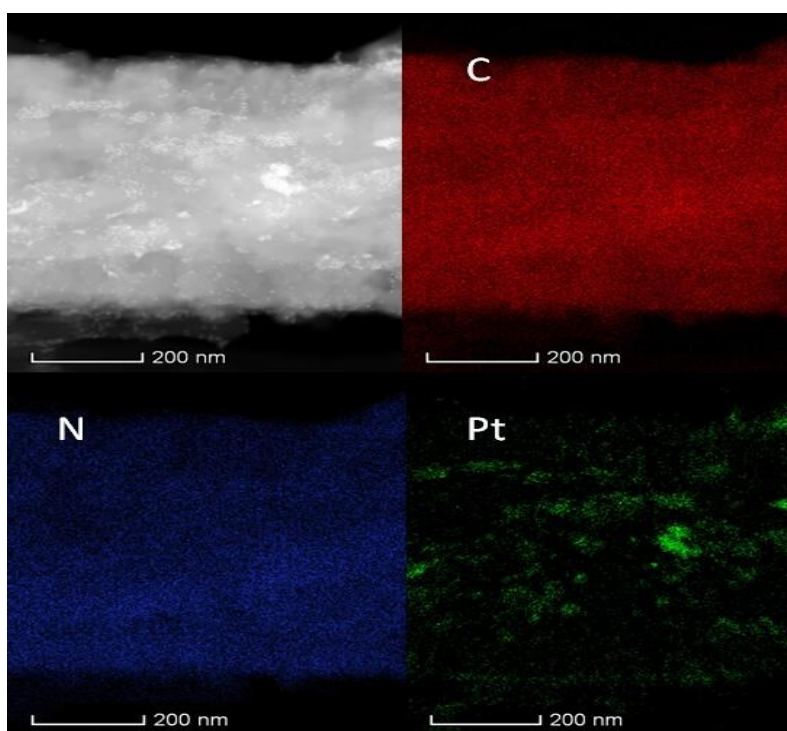

**Figure S11.** Elemental mapping of PFC-42-Pt.

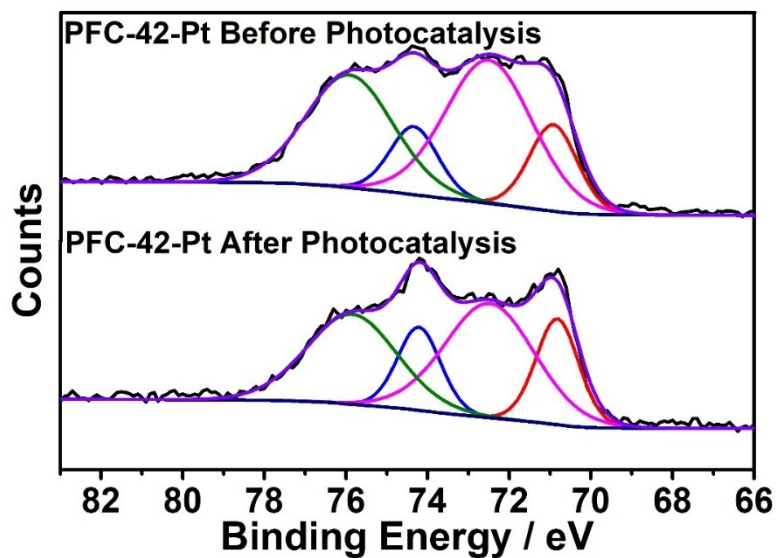

**Figure S12.** Pt 4f XPS spectra of PFC-42 before and after H<sub>2</sub> evolution.

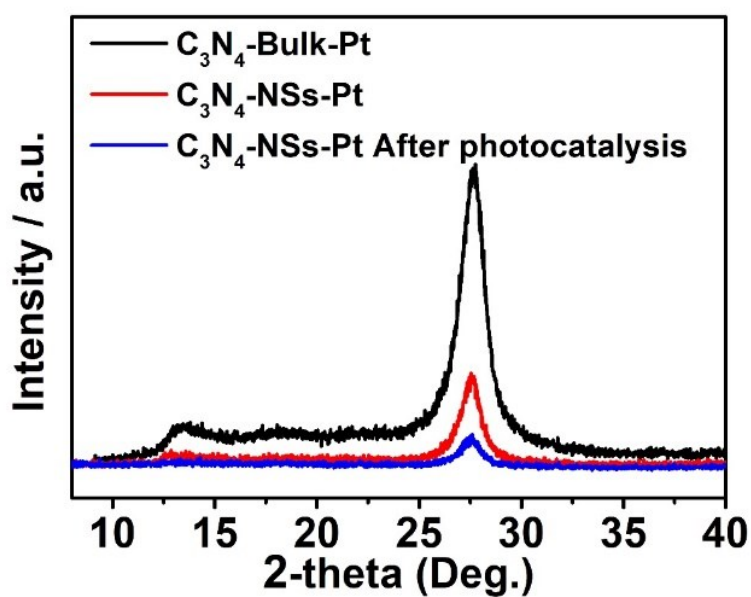

**Figure S13.** PXRD patterns of as-synthesized bulk C<sub>3</sub>N<sub>4</sub>-Pt, nanosheet C<sub>3</sub>N<sub>4</sub>-Pt, and C<sub>3</sub>N<sub>4</sub>-Pt after photocatalysis.

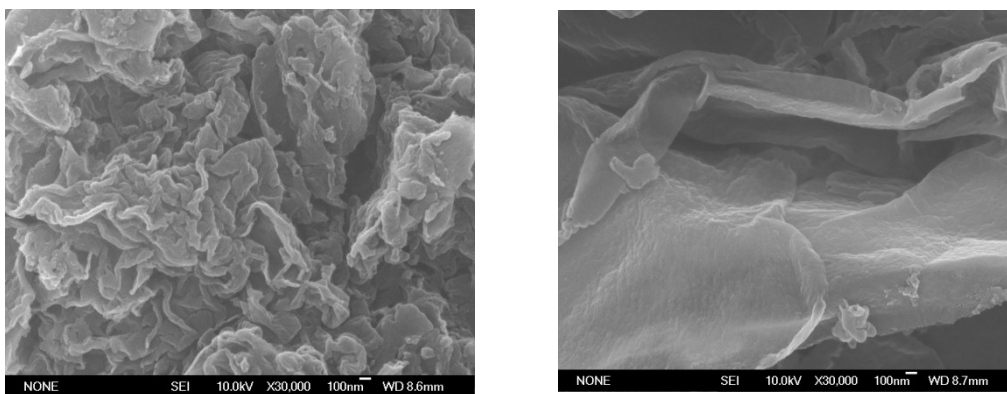

**Figure S14.** SEM images of nanosheet  $C_3N_4$

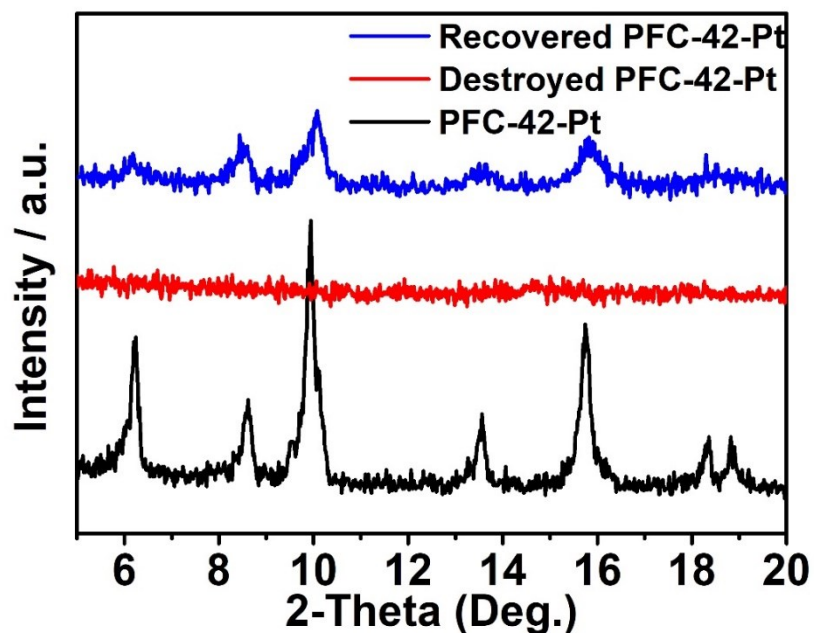

**Figure S15.** PXRD patterns of as-synthesized PFC-42-Pt, PFC-42-Pt-decomposed (destroyed with 12M HCl), and recovered PFC-42-Pt.

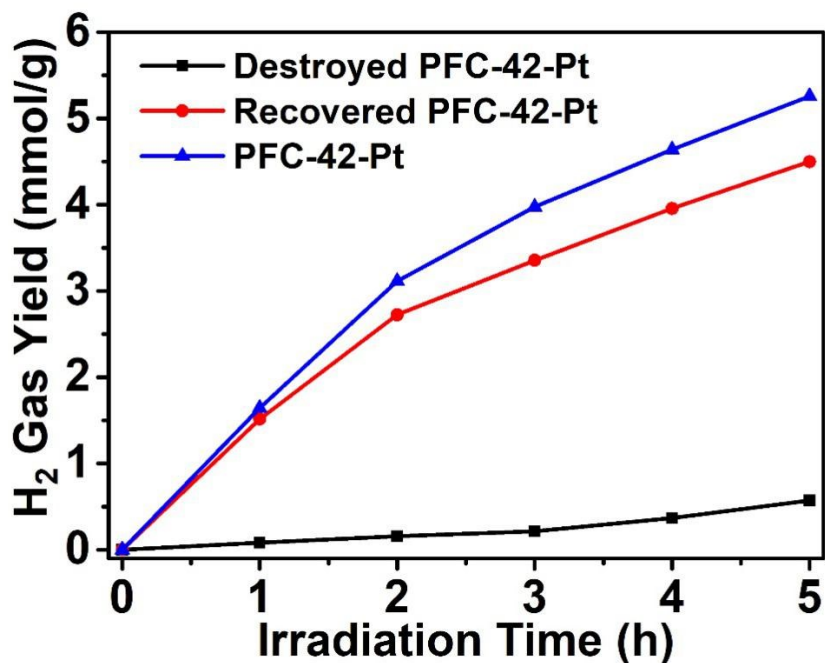

**Figure S16.** Photocatalytic H<sub>2</sub> evolution performance of as-synthesized PFC-42-Pt, Destroyed PFC-42-Pt (destroyed with 12M HCl), and-Recovered PFC-42-Pt (immersed in Methanol for 24h).

**Table S2.** The apparent quantum efficiency results for PFC-42.

| Wavelength (nm) | Irradiance (W * π cm <sup>-2</sup> ) | H <sub>2</sub> -evolution (μmol h <sup>-1</sup> 5mg <sup>-1</sup> ) | AQY (%) |
|-----------------|--------------------------------------|---------------------------------------------------------------------|---------|
| λ=420           | 0.47                                 | 26.4                                                                | 5.56    |

AQY is defined as the ratio of the number of reacted electrons to the number of incident photons.

The general equation is given below:

$$AQY (\%) = \frac{2 \times \text{the number of evolved hydrogen molecules}}{\text{the number of incident photons}} \times 100$$

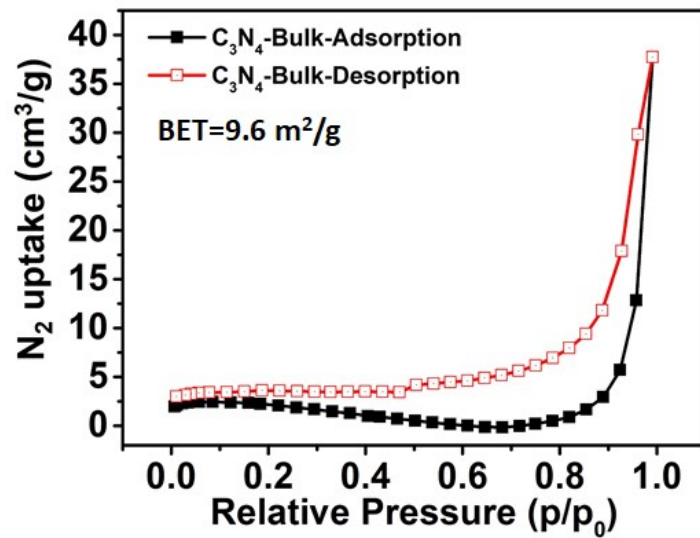

Figure S17.  $N_2$  adsorption isotherm of bulk  $C_3N_4$  at 77 K.

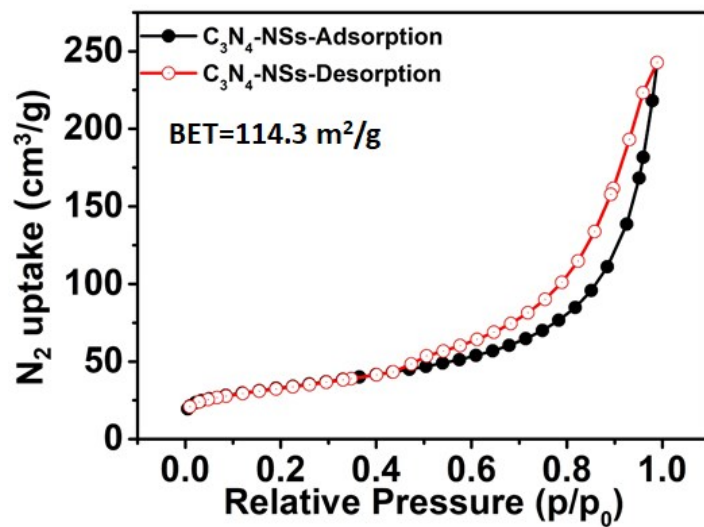

Figure S18.  $N_2$  adsorption isotherm of nanosheet  $C_3N_4$  at 77 K.



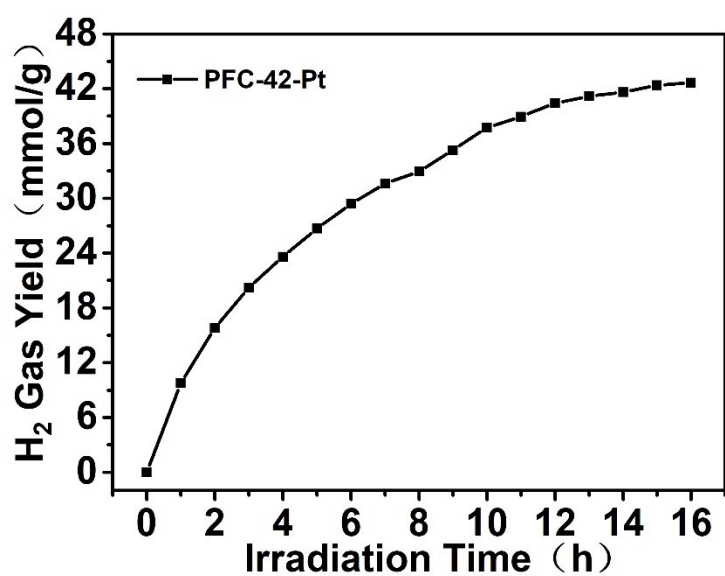

Figure S19. Photocatalytic activity lasting 16 hours.

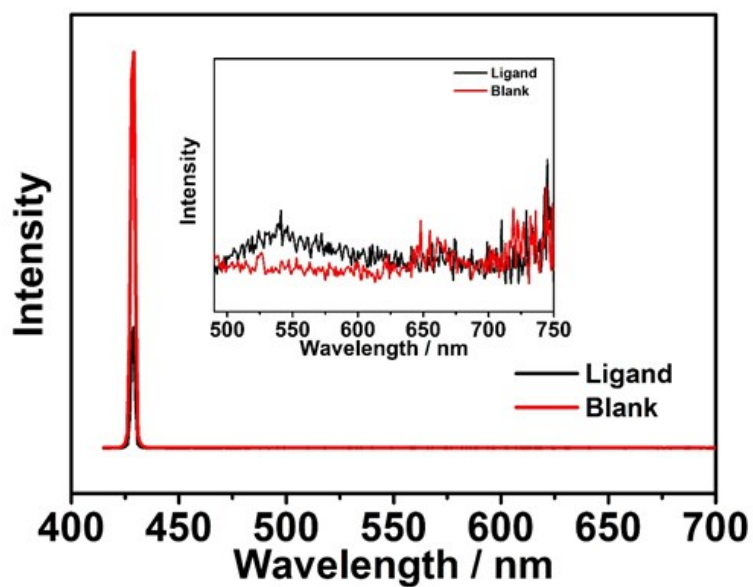

Figure S20. Fluorescence quantum efficiency of ligand.



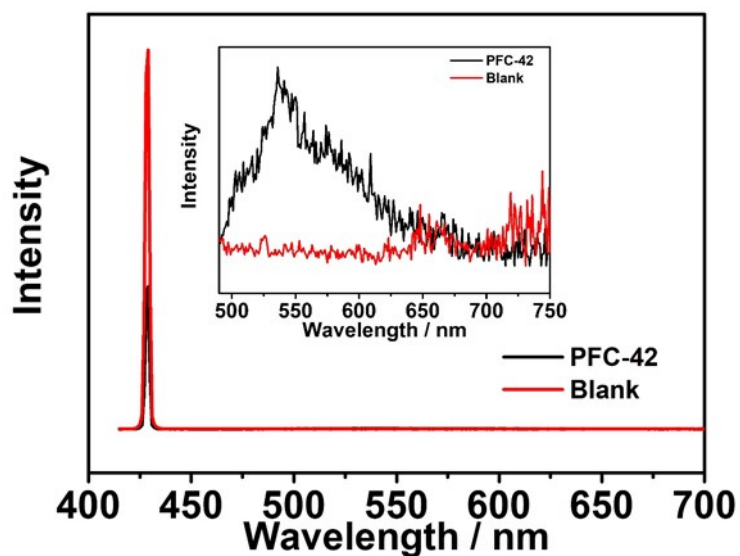

**Figure S21.** Fluorescence quantum efficiency of PFC-42.

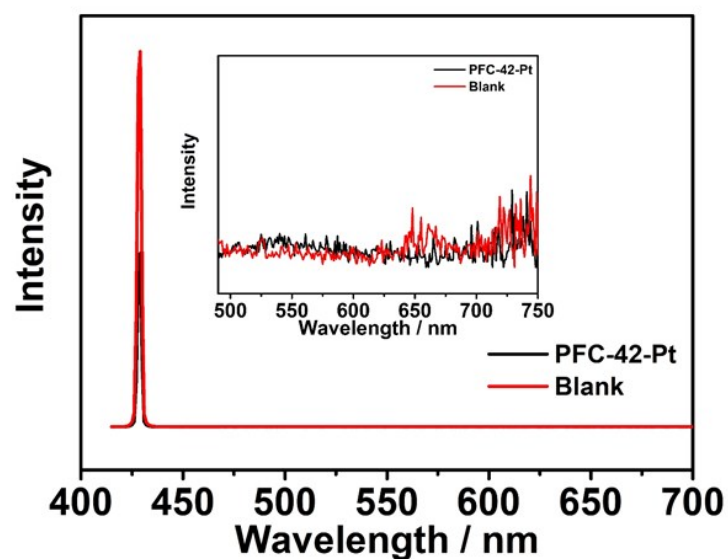

**Figure S22.** Fluorescence quantum efficiency of PFC-42-Pt.

**Table S3.** Fluorescence quantum efficiency results.

|                                 | <b>FigureS20</b> | <b>FigureS21</b> | <b>Figure S22</b> |
|---------------------------------|------------------|------------------|-------------------|
|                                 | Ligand           | PFC-42           | PFC-42-Pt         |
| Fluorescence quantum efficiency | 1.30%            | 7.80%            | 0.527%            |

All the samples are dispersed in ultrapure water with the same mass. Ultrapure water was used as a blank sample.

## 6. Summary of the performance of similar catalytic systems

**Table S4.** Summary of the activities of similar MOF or COF-based photocatalysts for H<sub>2</sub> evolution.

| Photocatalyst                                  | Cocatalyst | Electron donor | Solvent                                 | Illumination       | Activity ( $\mu\text{mol g}^{-1} \text{h}^{-1}$ ) | 420nmA QY (%) | Ref              |
|------------------------------------------------|------------|----------------|-----------------------------------------|--------------------|---------------------------------------------------|---------------|------------------|
| <b>PFC-42-Pt</b>                               | <b>Pt</b>  | <b>TEOA</b>    | <b>H<sub>2</sub>O</b>                   | <b>&gt; 400 nm</b> | <b>9733</b>                                       | <b>5.56</b>   | <b>This work</b> |
| Pt/x%-MIL-125-(SCH <sub>3</sub> ) <sub>2</sub> | Pt         | TEOA           | H <sub>2</sub> O                        | > 400 nm           | 3814                                              | <b>8.90</b>   | 3                |
| TFPT-COF                                       | Pt         | TEOA           | H <sub>2</sub> O                        | > 420 nm           | 1970                                              | <b>2.20</b>   | 4                |
| Pt@MIL-125/Au                                  | Pt&Au      | TEOA           | CH <sub>3</sub> CN/<br>H <sub>2</sub> O | 380-800 nm         | 1743                                              | —             | 5                |
| N <sub>3</sub> -COF                            | Pt         | TEOA           | PBS<br>Buffer                           | > 420 nm           | 1703                                              | —             | 6                |
| sp <sup>2</sup> c-COF                          | Pt         | TEOA           | H <sub>2</sub> O                        | > 420 nm           | 1360                                              | <b>0.46</b>   | 7                |
| Pt/PCN-777                                     | Pt         | TEOA           | DMF/<br>H <sub>2</sub> O                | AM 1.5G            | 586                                               | —             | 8                |
| USTC-8(In)                                     | Pt         | TEA            | CH <sub>3</sub> CN/<br>H <sub>2</sub> O | > 380 nm           | 341.3                                             | —             | 9                |
| TP-BDDA                                        | Pt         | TEOA           | H <sub>2</sub> O                        | ≥ 395 nm           | 324                                               | <b>1.30</b>   | 10               |
| Pt@UiO-66-NH <sub>2</sub>                      | Pt         | TEOA           | CH <sub>3</sub> CN/<br>H <sub>2</sub> O | > 380 nm           | 257.38                                            | —             | 11               |
| Al-TCPP-0.1Pt                                  | Pt         | TEOA           | CH <sub>3</sub> CN/<br>H <sub>2</sub> O | > 420 nm           | 129                                               | —             | 12               |
| Pt/Cd-TBAPy                                    | Pt         | TEOA           | CH <sub>3</sub> CN/<br>H <sub>2</sub> O | > 420 nm           | 86                                                | —             | 13               |

## 7. References:

- (1) Ke, Y. X.; Collins, D. J.; Sun, D. F.; Zhou, H. C. (10,3)-a noninterpenetrated network built from a Piedfort ligand pair. *Inorg Chem.* **2006**, *45*, 1897-1899.
- (2) Li, J.; Chen, Y.; Yang, X.; Gao, S.; Cao, R. Visible-light-mediated high-efficiency catalytic oxidation of sulfides using wrinkled C<sub>3</sub>N<sub>4</sub> nanosheets. *J Catal.* **2020**, *381*, 579-589.
- (3) Han, S.-Y.; Pan, D.-L.; Chen, H.; Bu, X.-B.; Gao, Y.-X.; Gao, H.; Tian, Y.; Li, G.-S.; Wang, G.; Cao, S.-L.; Wan, C.-Q.; Guo, G.-C. A Methylthio-Functionalized-MOF Photocatalyst with High Performance for Visible-Light-Driven H<sub>2</sub> Evolution. *Angew. Chem., Int. Ed.* **2018**, *57*, 9864-9869.
- (4) Stegbauer, L.; Schwinghammer, K.; Lotsch, B. V. A hydrazone-based covalent organic framework for photocatalytic hydrogen production. *Chem Sci.* **2014**, *5*, 2789-2793.
- (5) Xiao, J.-D.; Han, L.; Luo, J.; Yu, S.-H.; Jiang, H.-L. Integration of Plasmonic Effects and Schottky Junctions into Metal-Organic Framework Composites: Steering Charge Flow for Enhanced Visible-Light Photocatalysis. *Angew. Chem. Int. Ed.* **2018**, *57*, 1103-1107.
- (6) Vyas, V. S.; Haase, F.; Stegbauer, L.; Savasci, G.; Podjaski, F.; Ochsenfeld, C.; Lotsch, B. V. A tunable azine covalent organic framework platform for visible light-induced hydrogen generation. *Nat Commun.* **2015**, *6*, 8508.
- (7) Jin, E.; Lan, Z.; Jiang, Q.; Geng, K.; Li, G.; Wang, X.; Jiang, D. 2D sp<sup>2</sup> Carbon-Conjugated Covalent Organic Frameworks for Photocatalytic Hydrogen Production from Water. *Chem.* **2019**, *5(6)*, 1632-1647.
- (8) Liu, H.; Xu, C.; Li, D.; Jiang, H.-L. Photocatalytic Hydrogen Production Coupled with Selective Benzylamine Oxidation over MOF Composites. *Angew. Chem. Int. Ed.* **2018**, *57*, 5379-5383.
- (9) Leng, F.; Liu, H.; Ding, M.; Lin, Q.-P.; Jiang, H.-L. Boosting Photocatalytic Hydrogen Production of Porphyrinic MOFs: The Metal Location in Metalloporphyrin Matters. *Acs Catal.* **2018**, *8*, 4583-4590.
- (10) Pachfule, P.; Acharjya, A.; Roeser, J.; Langenhahn, T.; Schwarze, M.; Schomaecker, R.; Thomas, A.; Schmidt, J. Diacetylene Functionalized Covalent Organic Framework (COF) for Photocatalytic Hydrogen Generation. *J Am Chem Soc.* **2018**, *140*, 1423-1427.
- (11) Xiao, J.-D.; Shang, Q.; Xiong, Y.; Zhang, Q.; Luo, Y.; Yu, S.-H.; Jiang, H.-L. Boosting Photocatalytic Hydrogen Production of a Metal-Organic Framework Decorated with Platinum Nanoparticles: The Platinum Location Matters. *Angew. Chem. Int. Ed.* **2016**, *55*, 9389-9393.
- (12) Fang, X.; Shang, Q.; Wang, Y.; Jiao, L.; Yao, T.; Li, Y.; Zhang, Q.; Luo, Y.; Jiang, H.-L. Single Pt Atoms Confined into a Metal-Organic Framework for Efficient Photocatalysis. *Adv Mater.* **2018**, *30(7)*:1705112.
- (13) Xiao, Y.; Qi, Y.; Wang, X.; Wang, X.; Zhang, F.; Li, C. Visible-Light-Responsive 2D Cadmium-Organic Framework Single Crystals with Dual Functions of Water Reduction and Oxidation. *Adv Mater.* **2018**, *30(44)*:1803401.1-1803401.7.
